# Supplementary material for: Bicyclic σ receptor ligands by stereoselective Dieckmann analogous cyclization of piperazinebutyrate
Source: Royal Society of Chemistry journal article supplement (doi:10.1039/c003878d), 2010-01-01

# Bicyclic $\sigma$ Receptor Ligands by Stereoselective Dieckmann Analogous Cyclization of Piperazinebutyrate

**Sunil Kumar Sunnam,<sup>a</sup> Dirk Schepmann,<sup>a</sup> Birgit Wibbeling,<sup>b</sup> Bernhard Wünsch<sup>a\*</sup>**

<sup>5</sup>

<sup>a</sup>Institut für Pharmazeutische und Medizinische Chemie der Universität Münster, Hittorfstraße 58-62, D-48149 Münster, Germany  
Tel.: +49-251-8333311; Fax: +49-251-8332144; E-mail: [wuensch@uni-muenster.de](mailto:wuensch@uni-muenster.de)

<sup>b</sup>Organisch-Chemisches Institut der Westfälischen Wilhelms-Universität Münster, Corrensstr. 40, D-48149 Münster, Germany

<sup>10</sup>

**HPLC Chromatograms and NMR spectra of Stable Compounds**

HPLC Chromatogram of Compound 10

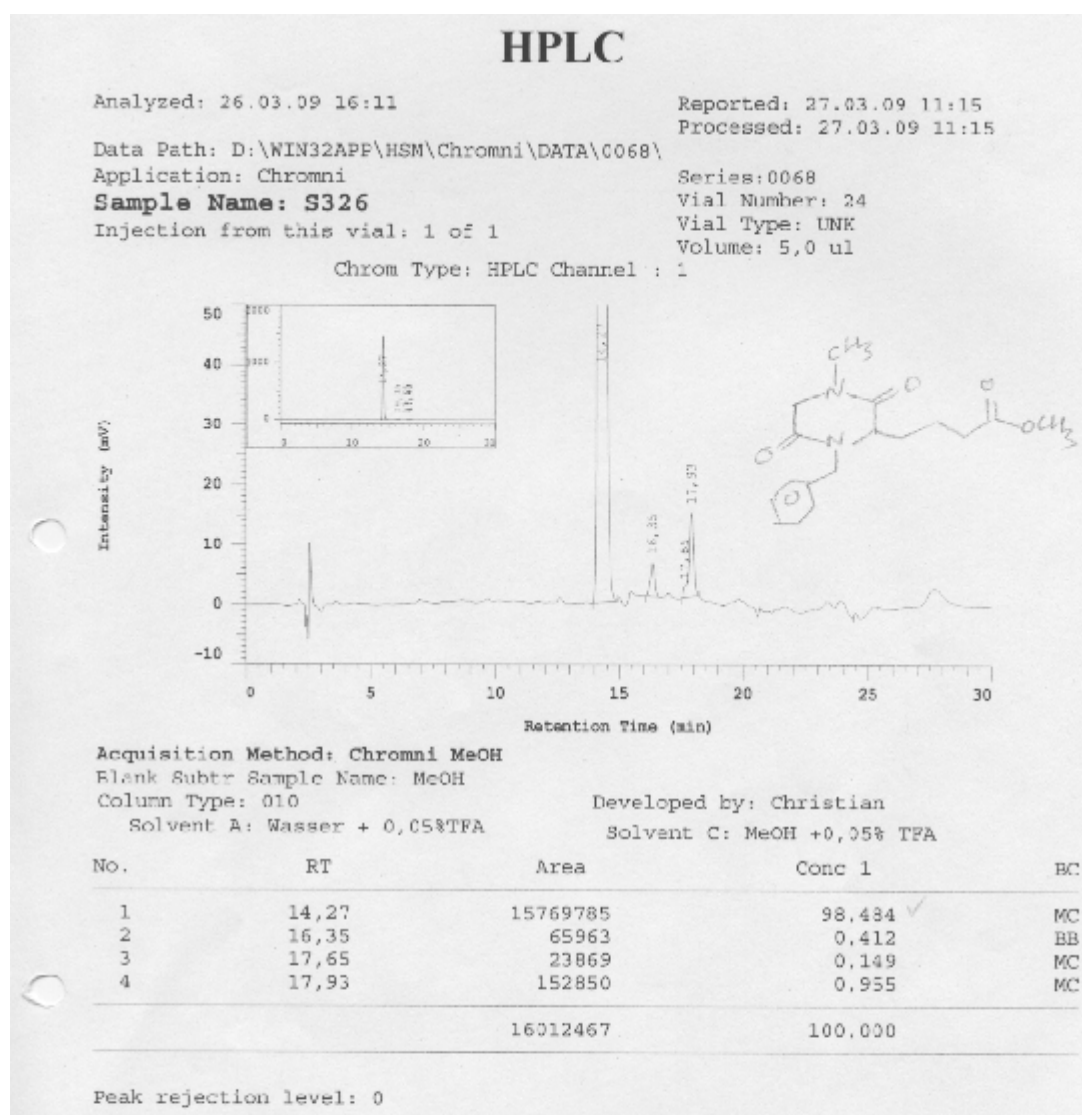

HPLC Chromatogram of Compound 12

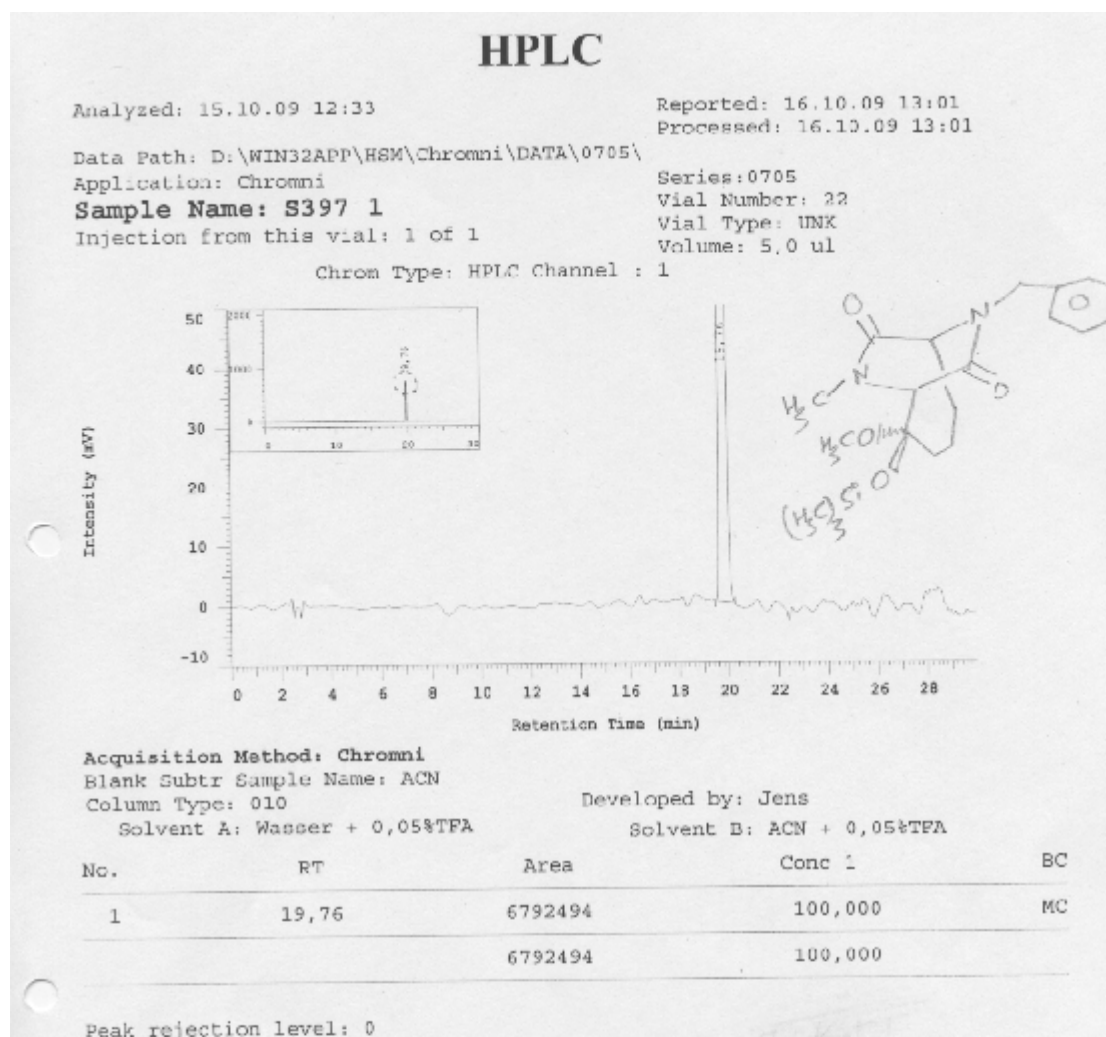

HPLC Chromatogram of Compound 13

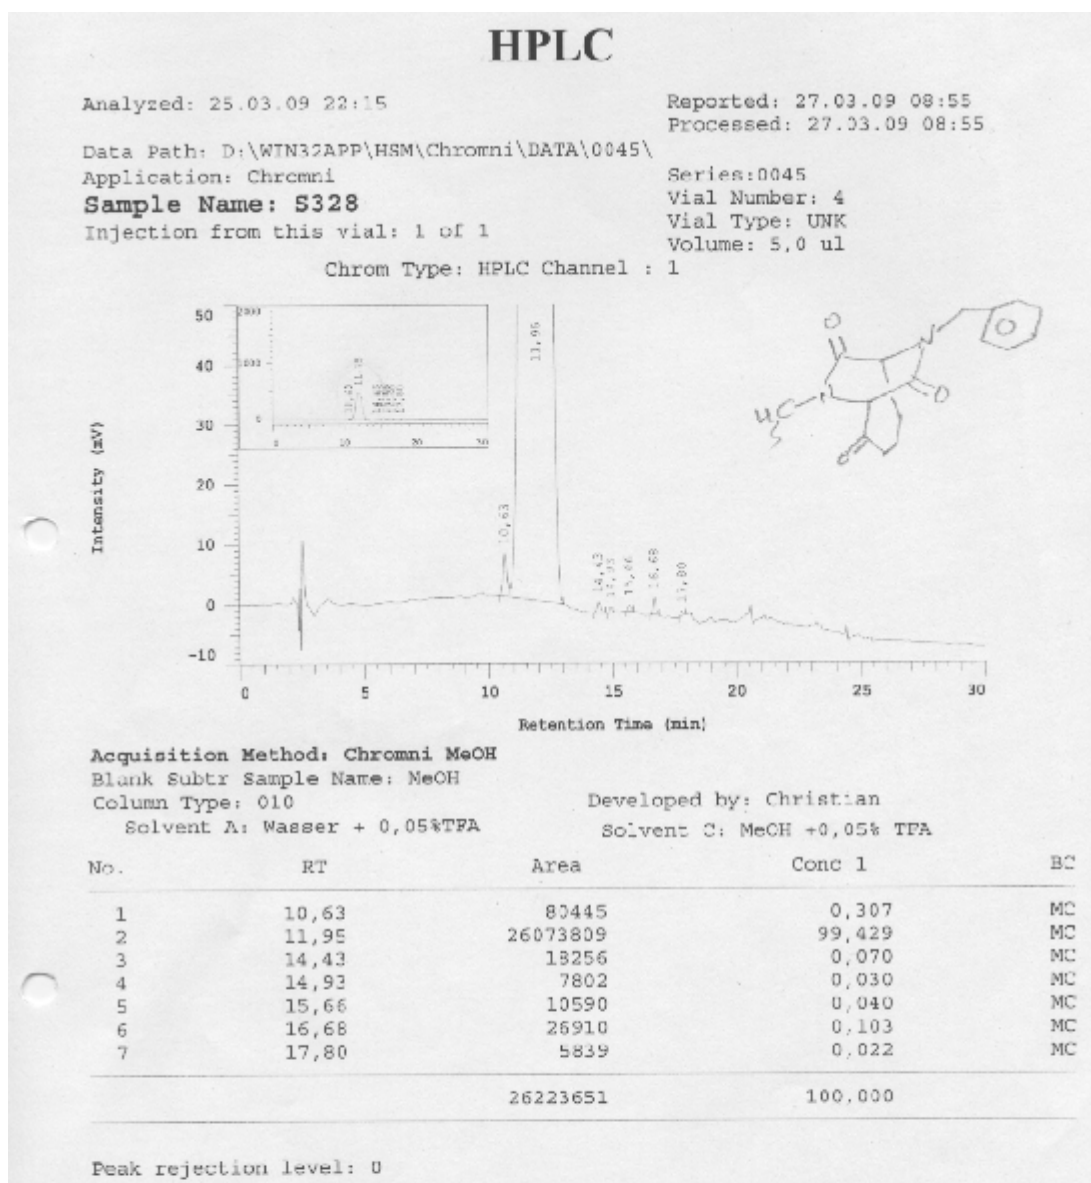

<sup>1</sup>H NMR spectrum of Compound 13

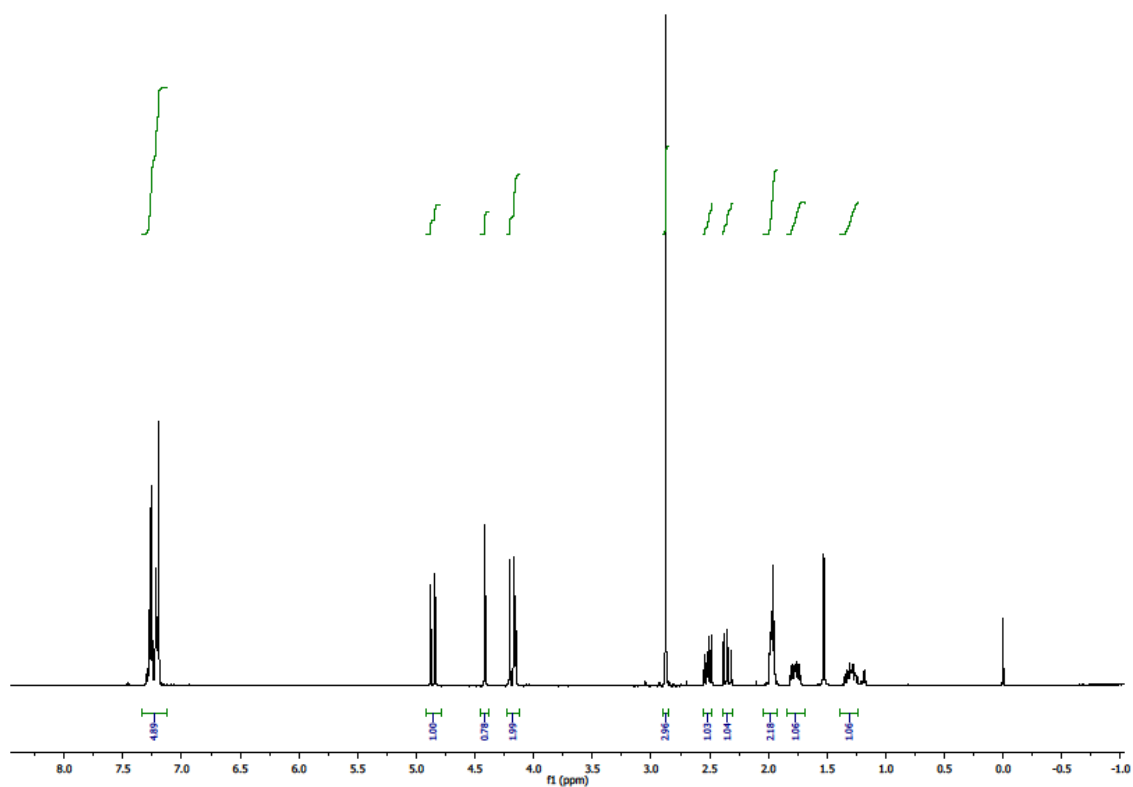

<sup>13</sup>C NMR spectrum of compound 13

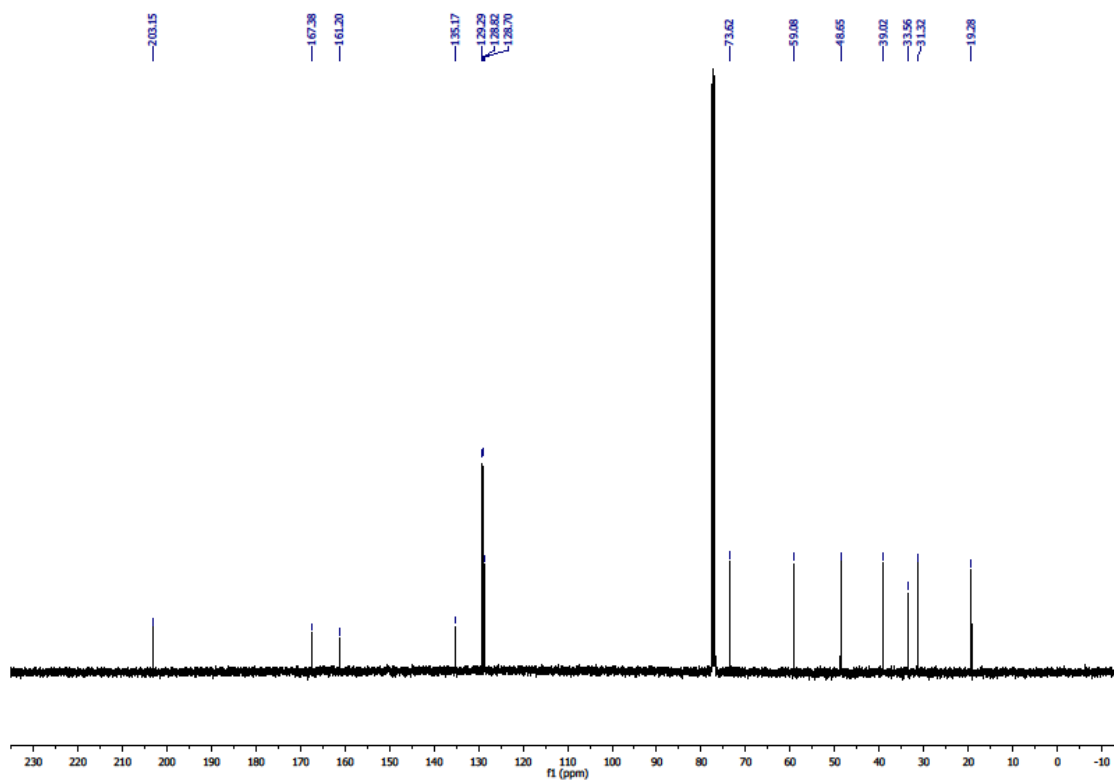

HPLC chromatogram of compound 14

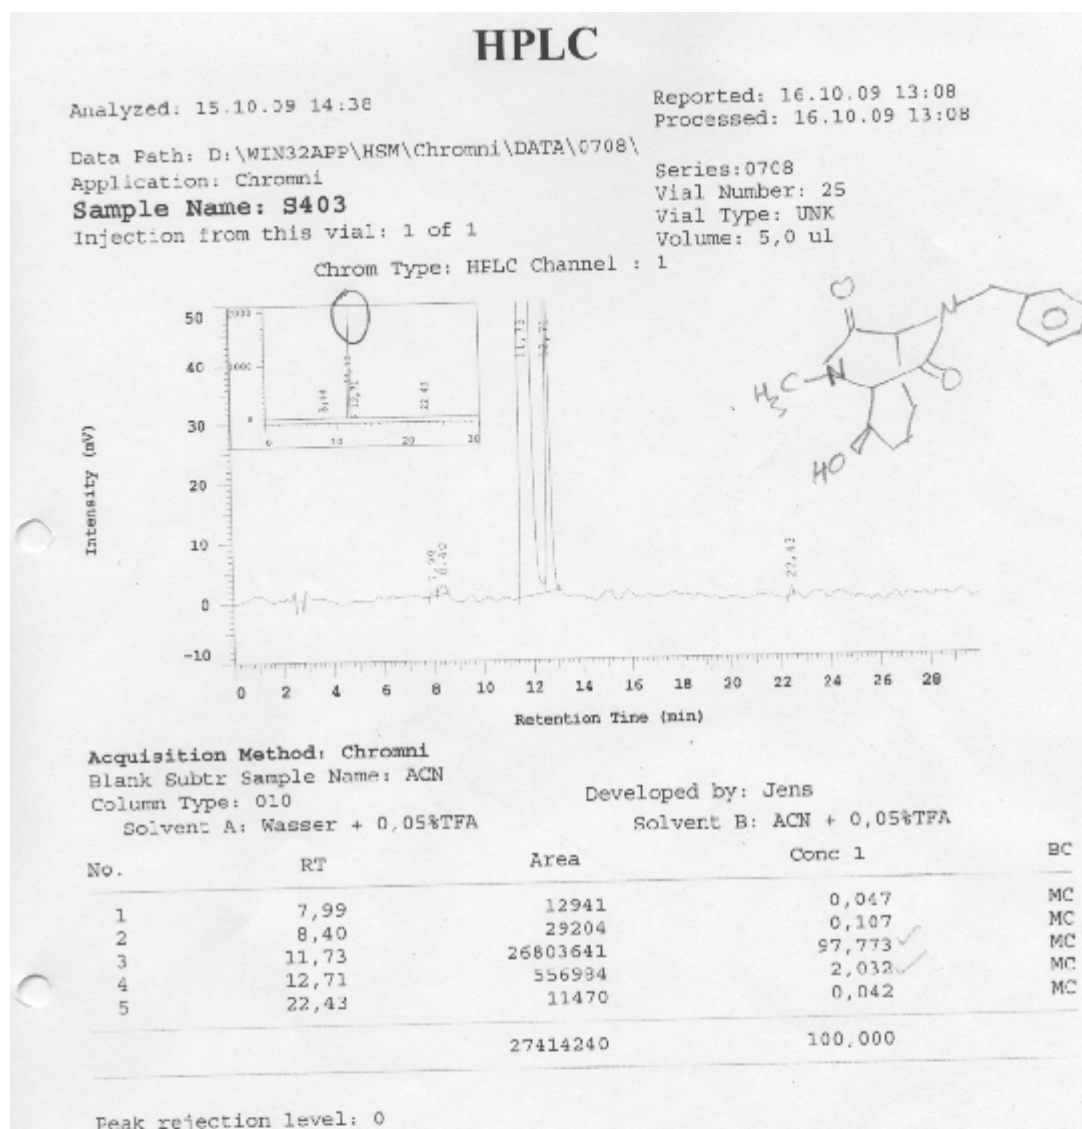

HPLC chromatogram of compound 15

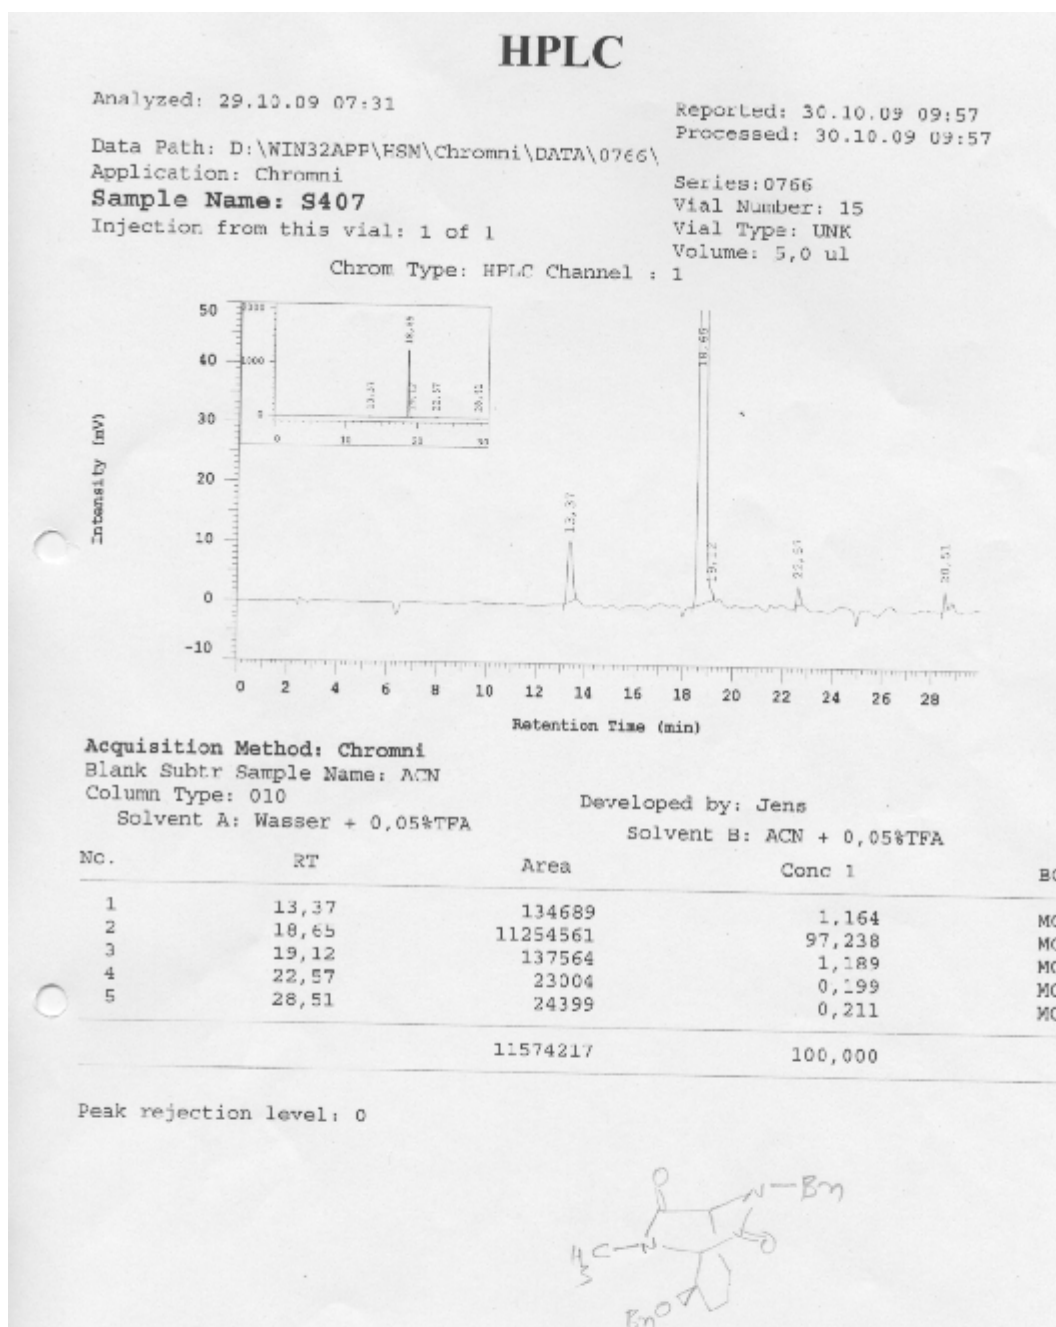

HPLC chromatogram of compound 16

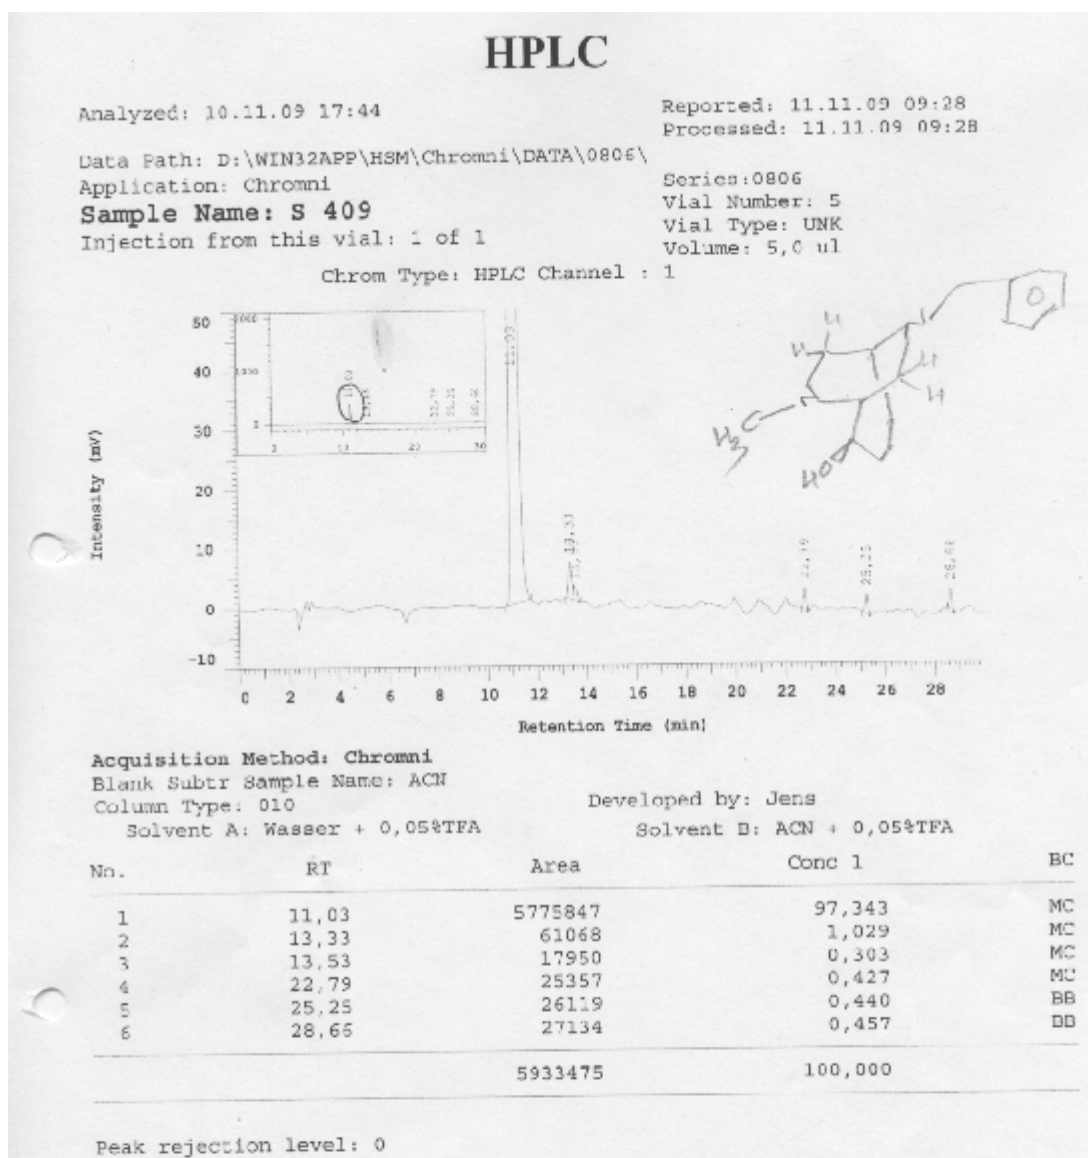



<sup>1</sup>H NMR spectrum of Compound 16

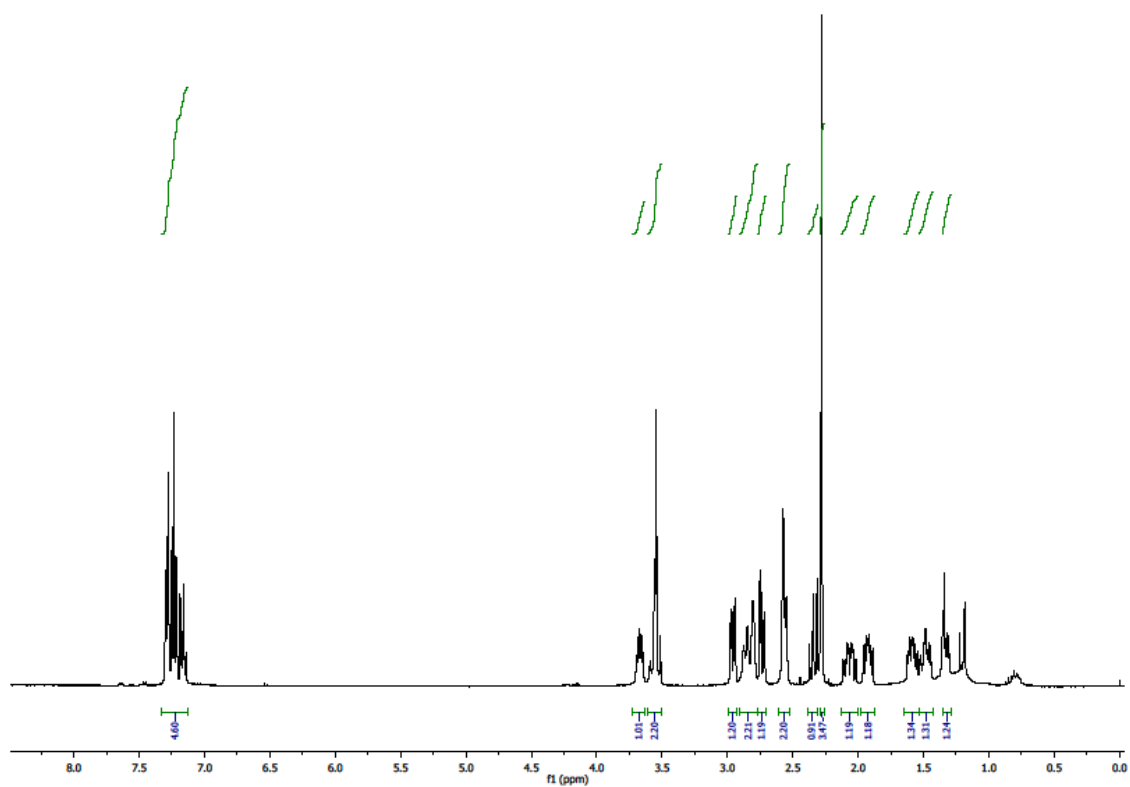

<sup>13</sup>C NMR spectrum of Compound 16

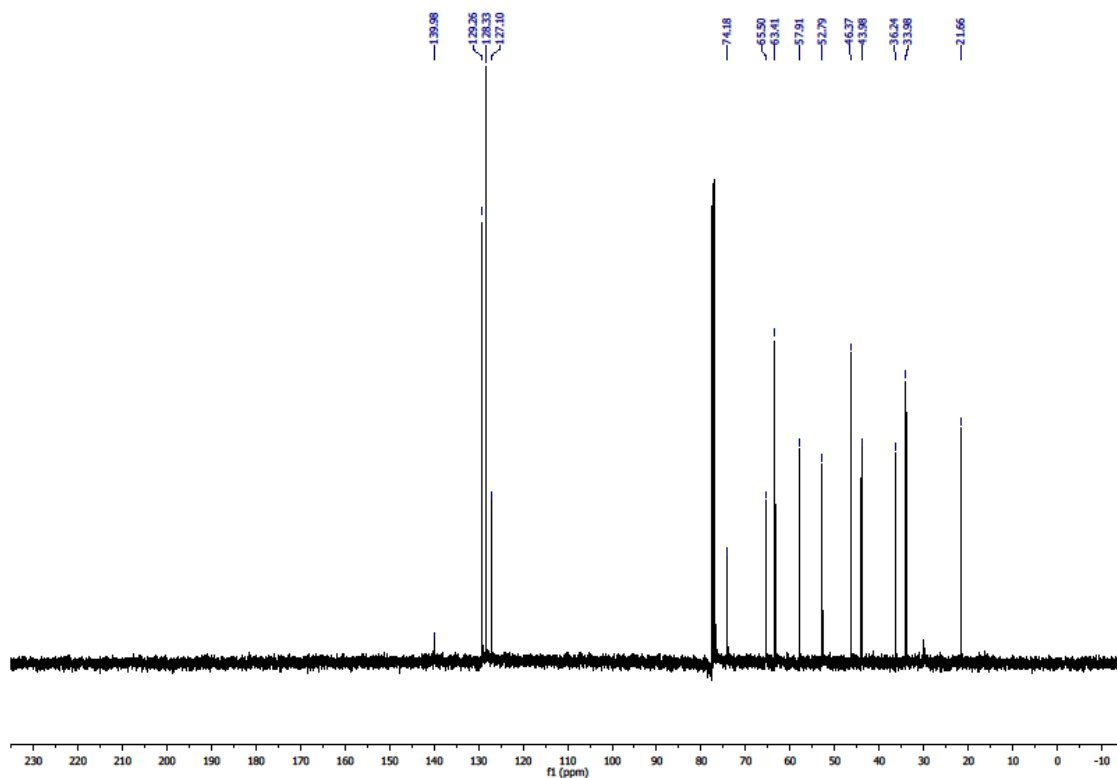

HPLC Chromatogram of compound 17

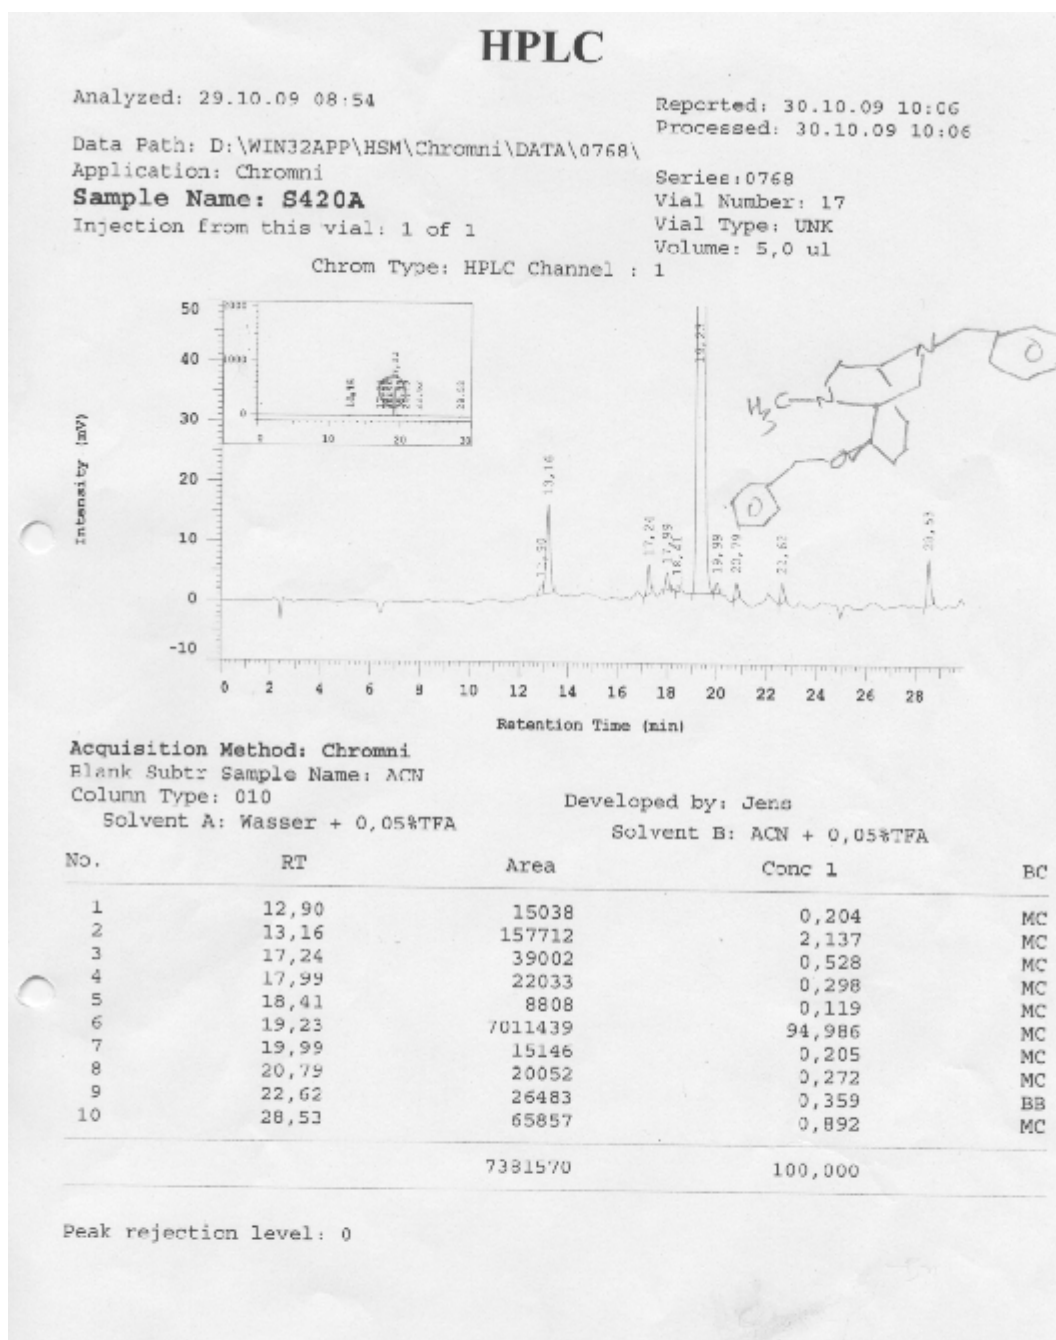

Supplement: c003878d.pdf [file c003878d.pdf]
